# Supplementary material for: Cholinergic white matter pathways in dementia with Lewy bodies and Alzheimer’s disease
Source: PubMed Central journal article supplement (PMC9166545; doi:10.1093/brain/awab372), 2021-10-04
Supplement: awab372_supplementary_data.pdf [file awab372_supplementary_data.pdf]

**Supplementary Table 1** Group comparison of radial and axial diffusivity. Mean (standard deviation) per diagnostic group and results from univariate ANCOVAs controlling for age, sex, and diffusivity from the white matter control mask. P-values from post-hoc tests are Bonferroni-corrected for multiple comparisons. All P-values from pairwise post-hoc comparisons that are not listed are >0.1

|                            | Controls             | MCI-AD               | AD                   | MCI-LB               | DLB                  | Group comparison                                                                                                                       |
|----------------------------|----------------------|----------------------|----------------------|----------------------|----------------------|----------------------------------------------------------------------------------------------------------------------------------------|
| <b>Medial NBM pathway</b>  |                      |                      |                      |                      |                      |                                                                                                                                        |
| Radial diffusivity         | 0.00062<br>(0.00005) | 0.00065<br>(0.00007) | 0.00067<br>(0.00006) | 0.00063<br>(0.00005) | 0.00065<br>(0.00006) | F(4,230)=1.4, P=0.24                                                                                                                   |
| Axial diffusivity          | 0.00132<br>(0.00005) | 0.00135<br>(0.00007) | 0.00138<br>(0.00007) | 0.00135<br>(0.00005) | 0.00137<br>(0.00007) | F(4,230)=8.5 P<0.001<br><br>P(controls, AD)<0.001<br>P(controls, DLB)=0.001                                                            |
| <b>Lateral NBM pathway</b> |                      |                      |                      |                      |                      |                                                                                                                                        |
| Radial diffusivity         | 0.00079<br>(0.00007) | 0.00084<br>(0.0001)  | 0.00089<br>(0.00008) | 0.00085<br>(0.00008) | 0.00086<br>(0.0001)  | F(4,230)=9.0, P<0.001<br><br>P(controls, MCI-AD)=0.01<br>P(controls, AD)<0.001<br>P(controls, MCI-LB)<0.001<br>P(controls, DLB)=0.003  |
| Axial diffusivity          | 0.00133<br>(0.00008) | 0.00138<br>(0.0001)  | 0.00144<br>(0.00008) | 0.00139<br>(0.00008) | 0.00140<br>(0.00009) | F(4,230)=13.0, P<0.001<br><br>P(controls, MCI-AD)=0.07<br>P(controls, AD)<0.001<br>P(controls, MCI-LB)=0.003<br>P(controls, DLB)<0.001 |

AD, Alzheimer's disease dementia; DLB, dementia with Lewy bodies; MCI-AD, mild cognitive impairment due to Alzheimer's disease; MCI-LB, MCI with Lewy bodies; NBM, nucleus basalis of Meynert
